# Supplementary material for: Ball milling as an effective route for the preparation of doped bornite: synthesis, stability and thermoelectric properties
Source: Royal Society of Chemistry journal article supplement (doi:10.1039/c5tc01704a), 2015-01-01
Supplement: c5tc01704a1.pdf [file c5tc01704a1.pdf]

## Supplementary Information for:

### **Ball milling as an effective route for the preparation of doped bornite: synthesis, stability and thermoelectric properties**

G. Guélou, A. V. Powell and P. Vaqueiro\*

Department of Chemistry, University of Reading, Whiteknights, RG6 6AD

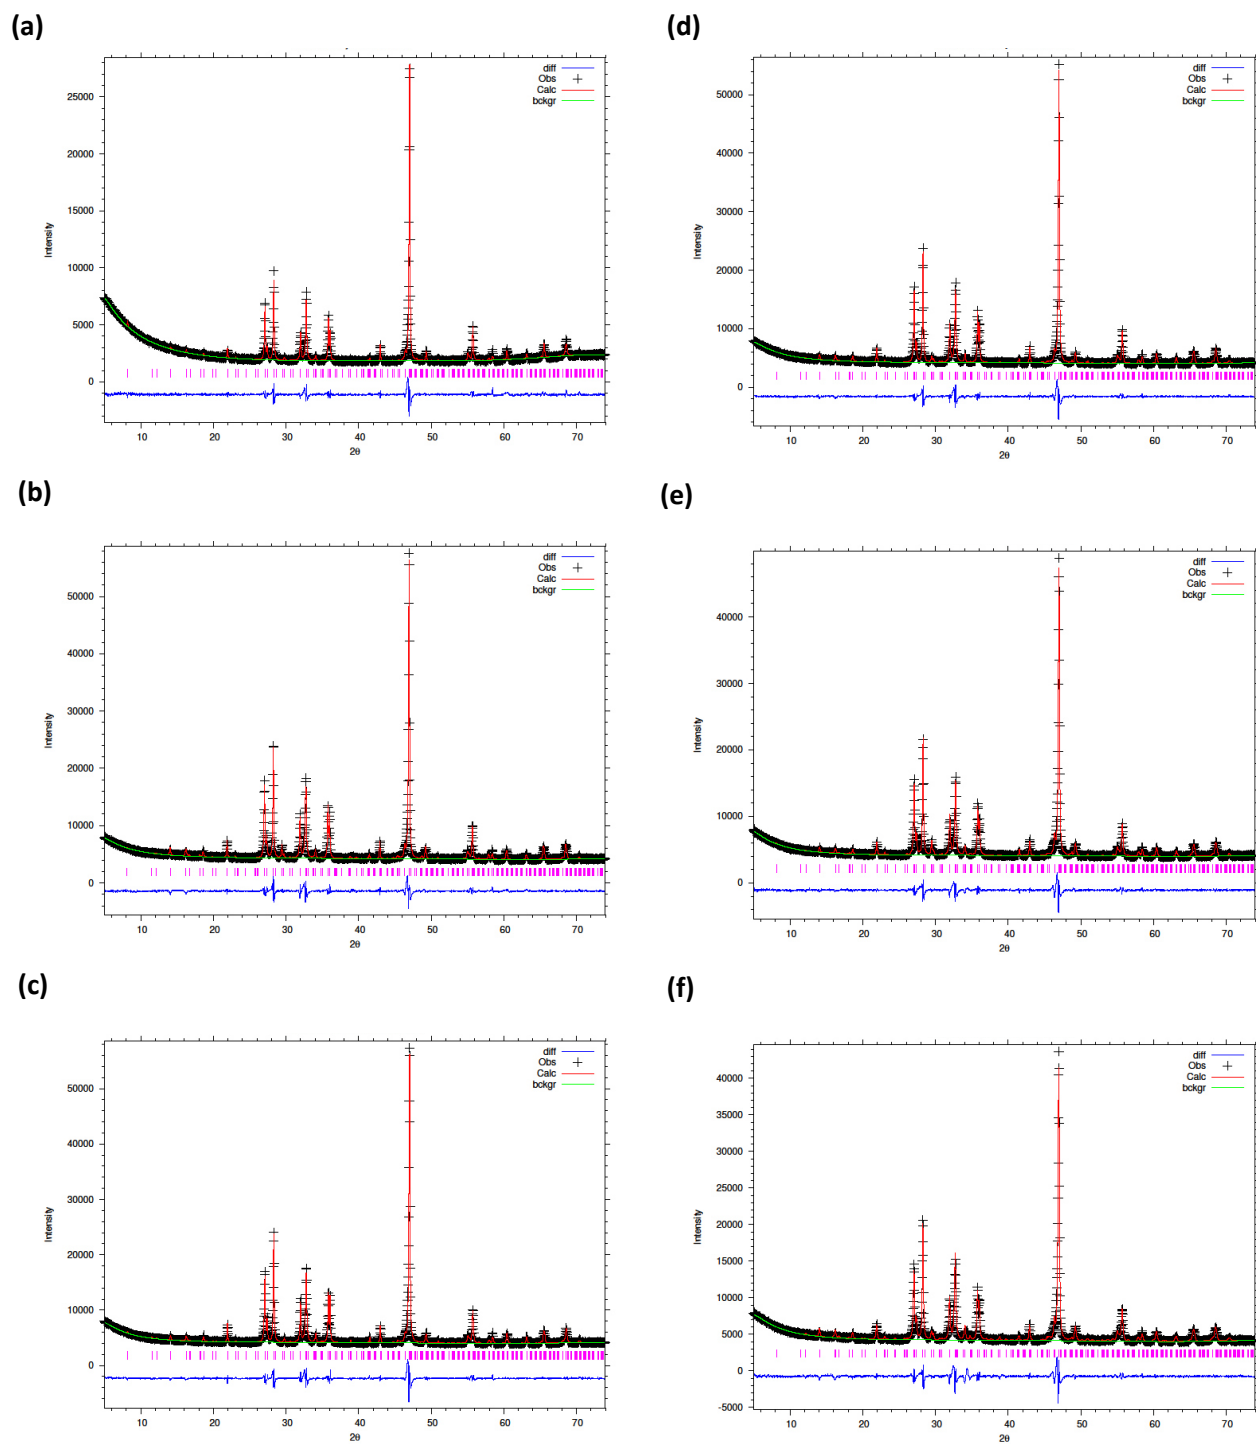

**Fig. S1** Le Bail refinement using X-ray diffraction data of the consolidated  $\text{Cu}_5\text{Fe}_{1-x}\text{Mn}_x\text{S}_4$  pellets, (a)  $x = 0.01$  ( $R_{\text{wp}} = 4.21\%$ ), (b)  $x = 0.02$  ( $R_{\text{wp}} = 3.97\%$ ), (c)  $x = 0.03$  ( $R_{\text{wp}} = 4.29\%$ ), (d)  $x = 0.04$  ( $R_{\text{wp}} = 3.96\%$ ), (e)  $x = 0.05$  ( $R_{\text{wp}} = 3.77\%$ ) and (f)  $x = 0.10$  ( $R_{\text{wp}} = 4.15\%$ ). Observed (black crosses), calculated (red line) and difference (lower blue line) profiles are plotted. Reflection positions for the orthorhombic phase (top) are marked.

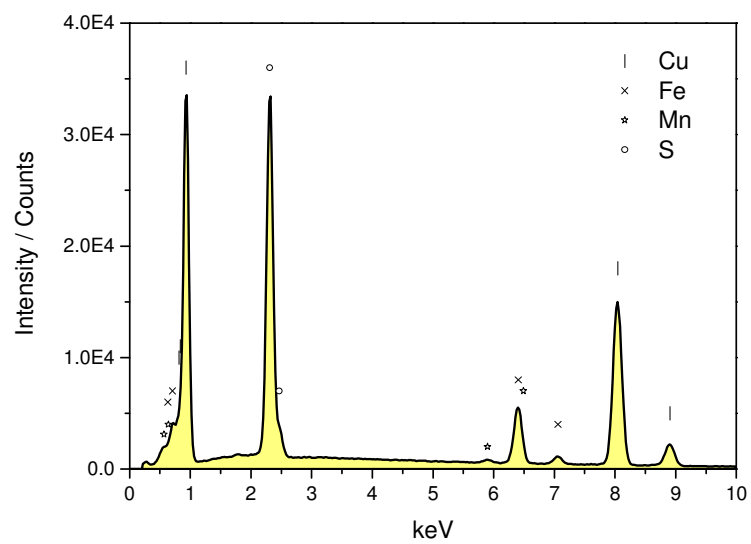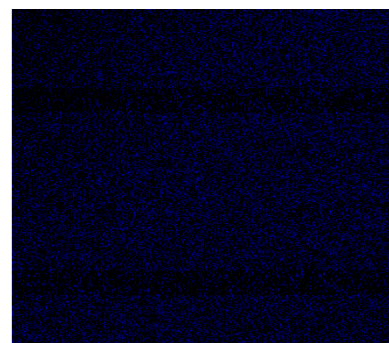

Cu Ka1

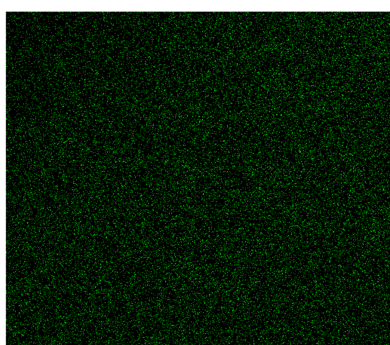

Fe Ka1

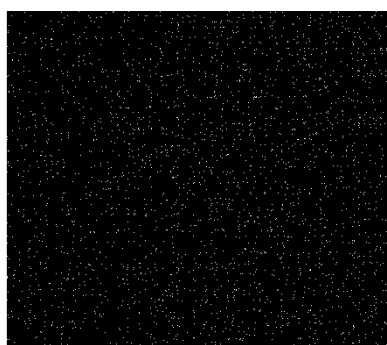

Mn Ka1

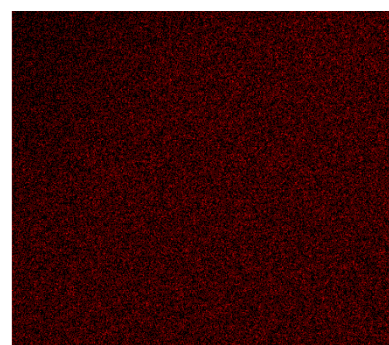

S Ka1

**Fig. S2** EDX spectrum and elemental maps for a consolidated sample of  $\text{Cu}_5\text{Fe}_{0.95}\text{Mn}_{0.05}\text{S}_4$ .

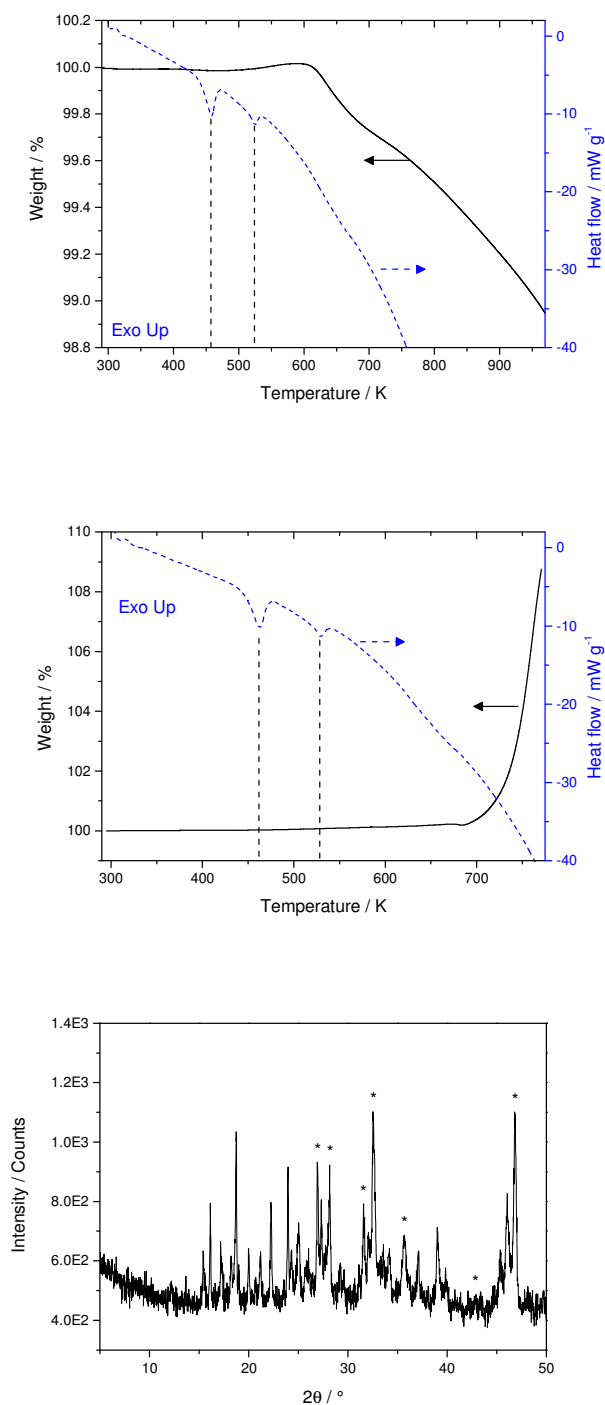

**Fig. S3** Combined TGA/DSC data for  $\text{Cu}_5\text{FeS}_4$  powder under nitrogen flow (top) and in air (middle), showing the temperature dependence of the weight percentage of the sample (solid black line) and the heat flow (dashed blue line). Graph at the bottom shows the powder X-ray diffraction pattern for bornite after the TGA/DSC in air, with peaks corresponding to bornite marked. Remaining peaks correspond to a mixture of copper sulfate oxides and copper sulfide.

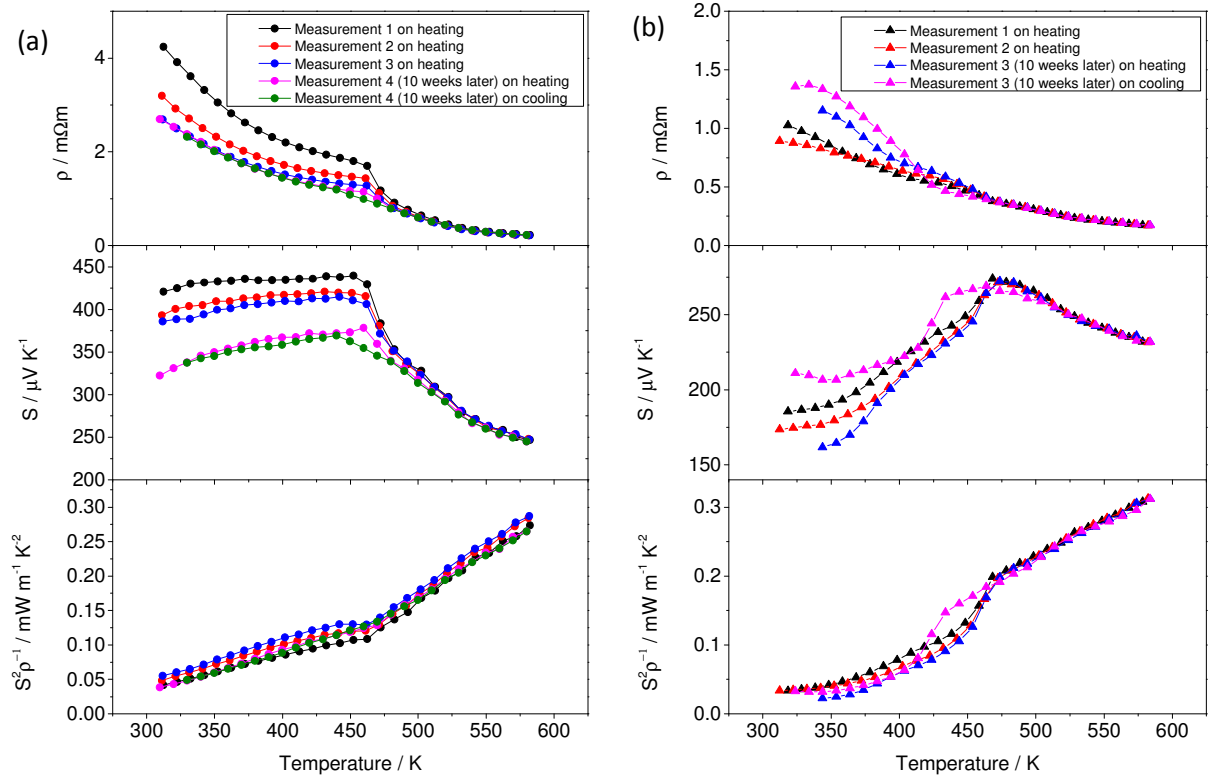

**Fig. S4** Repeated measurements on heating and cooling of the electrical resistivity (top), the Seebeck coefficient (middle) and the resulting power factor (bottom) as a function of temperature for (a)  $\text{Cu}_5\text{FeS}_4$  and (b)  $\text{Cu}_5\text{Fe}_{0.96}\text{Mn}_{0.04}\text{S}_4$ .

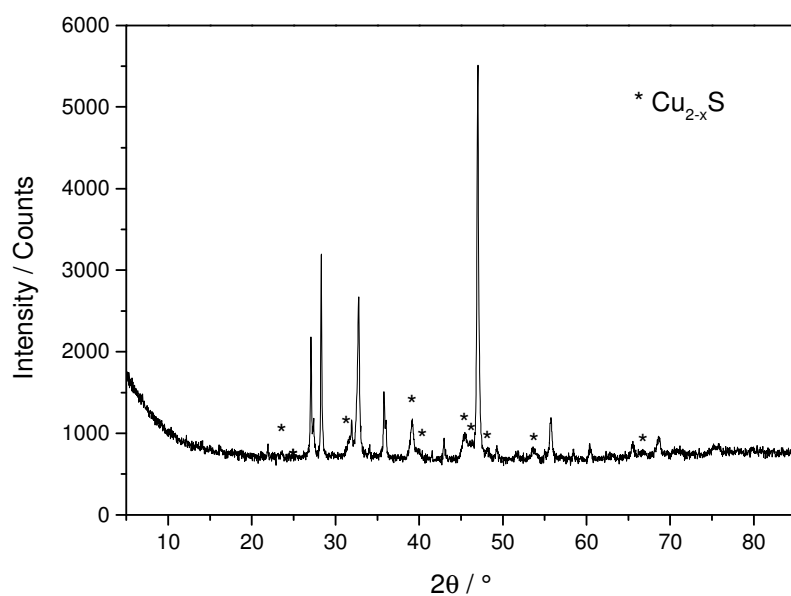

**Fig. S5** Powder X-ray diffraction data of  $\text{Cu}_5\text{FeS}_4$  after measurements of electrical transport property up to 890 K. The impurity peaks corresponding to  $\text{Cu}_{2-x}\text{S}$  are marked.

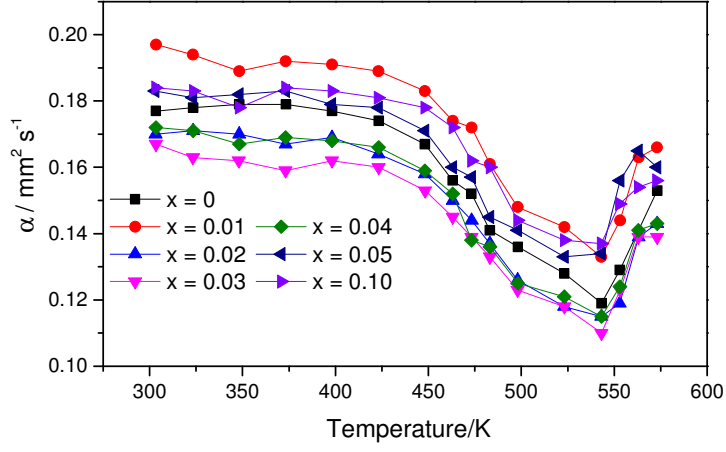

**Fig. S6** Temperature dependence of the thermal diffusivity,  $\alpha$ , of  $\text{Cu}_5\text{Fe}_{1-x}\text{Mn}_x\text{S}_4$ .

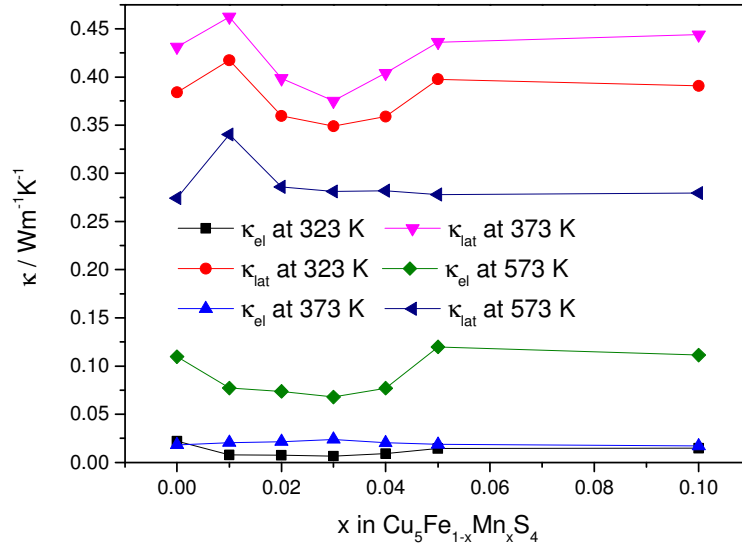

**Fig. S7** Estimated lattice and electronic components of the thermal conductivity of  $\text{Cu}_5\text{Fe}_{1-x}\text{Mn}_x\text{S}_4$  as a function of  $x$ , calculated using Wiedemann-Franz law, with  $L = 2.44 \times 10^{-8} \text{ W } \Omega \text{ K}^{-2}$ .
